# Supplementary material for: Strongly coupled interface facilitating charge separation to the improved visible light-driven hydrogen production on CdS@polydopamine/NiS photocatalyst
Source: Royal Society of Chemistry journal article supplement (doi:10.1039/d3ta01938a), 2023-01-01
Supplement: d3ta01938a1.pdf [file d3ta01938a1.pdf]

**Electronic Supporting information**

**Strongly coupled interface facilitating charge separation to the improved visible  
light driven hydrogen production on CdS@polydopamine/NiS photocatalyst**

**Yingying Qin,<sup>a,b</sup> Linli Xu,<sup>a,b\*</sup> Zhi Zhu<sup>c</sup> and Wai-Yeung Wong<sup>a,b\*</sup>**

<sup>a</sup> Department of Applied Biology and Chemical Technology and Research Institute for Smart Energy, The Hong Kong Polytechnic University (PolyU), Hung Hom, Hong Kong, P.R. China

<sup>b</sup> PolyU Shenzhen Research Institute, Shenzhen 518057, P.R. China

<sup>c</sup> Institute of the Green Chemistry and Chemical Technology, Institute for Advanced Materials, Jiangsu University, Zhenjiang 212013, P.R. China

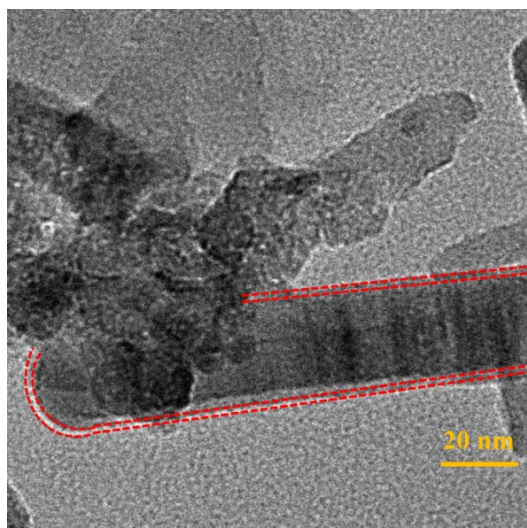

**Fig. S1.** TEM image of CdS@pDA.

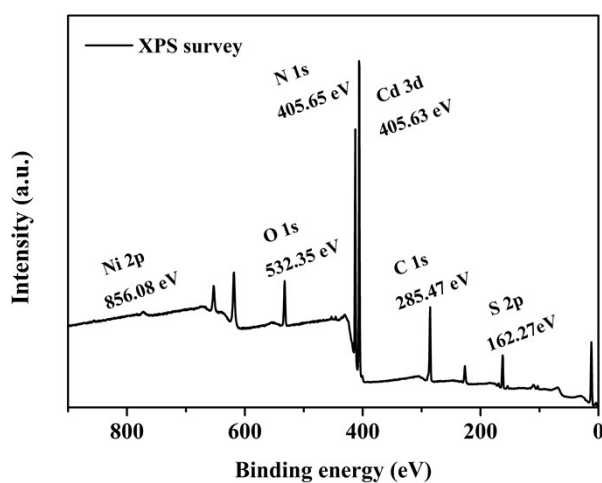

**Fig. S2.** XPS survey spectra of CdS@pDA/NiS.

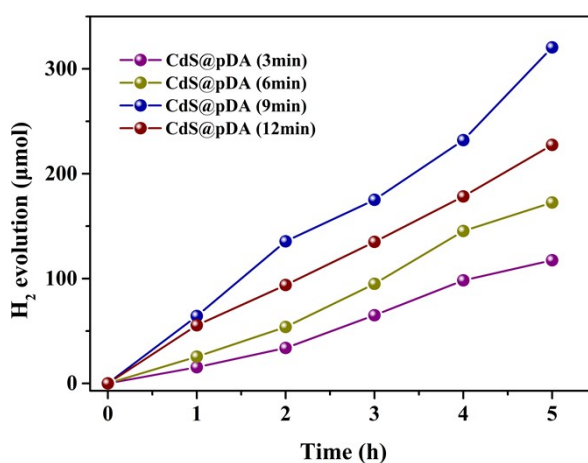

**Fig. S3.** Time courses of photocatalytic H<sub>2</sub> evolution over CdS@pDA with different polymerization time.

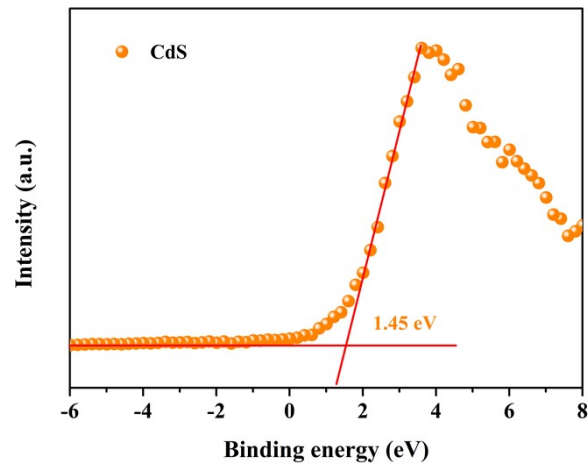

**Fig. S4.** The XPS-VB of CdS.

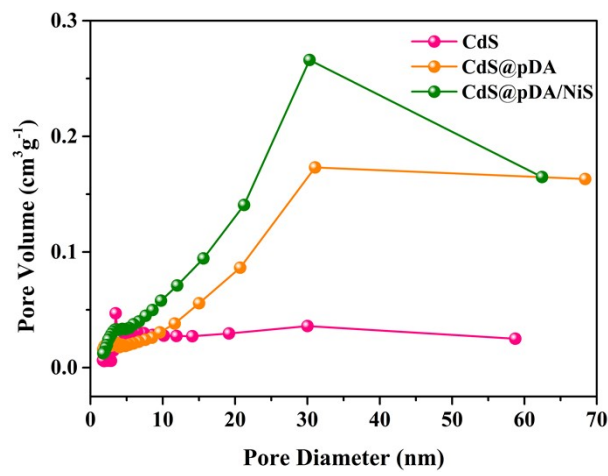

**Fig. S5.** BJH pore diameter distribution over CdS, CdS@pDA and CdS@pDA/NiS.
